# Supplementary material
Source: PubMed Central journal article supplement (PMC3901581)
Supplement: NIHMS545938-supplement-Suppl_2.pdf [file NIHMS545938-supplement-Suppl_2.pdf]

**Table S1: Gene Ontology pathways over-represented in the list of IR-regulated genes**

| Pvalue | ExpCount | Count | Term                                                       |
|--------|----------|-------|------------------------------------------------------------|
| 0      | 3        | 26    | cell cycle                                                 |
| 0      | 1        | 19    | mitotic cell cycle                                         |
| 0      | 1        | 16    | mitosis                                                    |
| 0      | 1        | 16    | M phase of mitotic cell cycle                              |
| 0      | 2        | 20    | cell cycle process                                         |
| 0      | 1        | 16    | M phase                                                    |
| 0      | 1        | 15    | cell division                                              |
| 0      | 2        | 17    | cell cycle phase                                           |
| 0      | 1        | 11    | microtubule-based process                                  |
| 0      | 0        | 7     | microtubule cytoskeleton organization and biogenesis       |
| 0      | 0        | 4     | spindle organization and biogenesis                        |
| 0      | 0        | 6     | microtubule-based movement                                 |
| 0      | 2        | 11    | cytoskeleton organization and biogenesis                   |
| 0      | 1        | 6     | cytoskeleton-dependent intracellular transport             |
| 0      | 0        | 4     | cell cycle checkpoint                                      |
| 0      | 0        | 4     | regulation of mitotic cell cycle                           |
| 0      | 4        | 12    | apoptosis                                                  |
| 0      | 4        | 12    | programmed cell death                                      |
| 0      | 0        | 3     | DNA damage checkpoint                                      |
| 0      | 0        | 3     | DNA integrity checkpoint                                   |
| 0      | 4        | 12    | cell death                                                 |
| 0      | 4        | 12    | death                                                      |
| 0      | 1        | 7     | regulation of cell cycle                                   |
| 0      | 0        | 3     | mitotic cell cycle checkpoint                              |
| 0.001  | 1        | 7     | response to DNA damage stimulus                            |
| 0.001  | 5        | 14    | cell development                                           |
| 0.001  | 0        | 2     | mitotic spindle organization and biogenesis                |
| 0.001  | 0        | 3     | DNA damage response, signal transduction                   |
| 0.002  | 0        | 3     | regulation of cyclin-dependent protein kinase activity     |
| 0.002  | 5        | 13    | organelle organization and biogenesis                      |
| 0.002  | 2        | 7     | response to endogenous stimulus                            |
| 0.003  | 0        | 2     | G2/M transition of mitotic cell cycle                      |
| 0.003  | 0        | 3     | chromosome segregation                                     |
| 0.003  | 3        | 9     | intracellular transport                                    |
| 0.004  | 1        | 5     | negative regulation of cell proliferation                  |
| 0.005  | 0        | 1     | positive regulation of non-apoptotic programmed cell death |
| 0.006  | 1        | 5     | regulation of transferase activity                         |
| 0.007  | 2        | 7     | regulation of cell proliferation                           |
| 0.007  | 0        | 3     | cell cycle arrest                                          |
| 0.008  | 0        | 3     | interphase of mitotic cell cycle                           |
| 0.008  | 4        | 9     | cell proliferation                                         |
| 0.009  | 0        | 2     | mitotic sister chromatid segregation                       |
| 0.009  | 0        | 3     | interphase                                                 |
| 0.009  | 0        | 2     | sister chromatid segregation                               |
| 0.01   | 0        | 1     | mitotic spindle elongation                                 |
| 0.01   | 0        | 1     | mitotic chromosome movement towards spindle pole           |

|      |   |   |                                                                       |
|------|---|---|-----------------------------------------------------------------------|
| 0.01 | 0 | 1 | mitotic cell cycle G2/M transition DNA damage checkpoint              |
| 0.01 | 0 | 1 | establishment and/or maintenance of microtubule cytoskeleton polarity |
| 0.01 | 0 | 1 | establishment and/or maintenance of cytoskeleton polarity             |
| 0.01 | 0 | 1 | spindle elongation                                                    |
| 0.01 | 0 | 1 | chromosome movement towards spindle pole                              |
| 0.01 | 0 | 1 | regulation of hair follicle development                               |
| 0.01 | 0 | 1 | positive regulation of hair follicle development                      |
| 0.01 | 0 | 1 | regulation of telomerase activity                                     |
| 0.01 | 0 | 1 | negative regulation of telomerase activity                            |
| 0.01 | 4 | 9 | regulation of developmental process                                   |
