# Supplementary material
Source: PubMed Central journal article supplement (PMC3901581)
Supplement: NIHMS545938-supplement-Suppl_3.pdf [file NIHMS545938-supplement-Suppl_3.pdf]

**Table S2: Gene Ontology pathways over-represented in the list of p53-regulated genes**

| Pvalue | ExpCount | Count | Term                                                           |
|--------|----------|-------|----------------------------------------------------------------|
| 0      | 6        | 18    | apoptosis                                                      |
| 0      | 6        | 18    | programmed cell death                                          |
| 0      | 2        | 10    | positive regulation of apoptosis                               |
| 0      | 2        | 10    | positive regulation of programmed cell death                   |
| 0      | 1        | 9     | induction of apoptosis                                         |
| 0      | 1        | 9     | induction of programmed cell death                             |
| 0      | 6        | 18    | cell death                                                     |
| 0      | 6        | 18    | death                                                          |
| 0      | 2        | 11    | positive regulation of developmental process                   |
| 0      | 8        | 21    | cell development                                               |
| 0      | 2        | 10    | response to DNA damage stimulus                                |
| 0      | 4        | 13    | regulation of apoptosis                                        |
| 0      | 4        | 13    | regulation of programmed cell death                            |
| 0      | 0        | 4     | caspase activation                                             |
| 0      | 0        | 4     | positive regulation of caspase activity                        |
| 0      | 1        | 5     | cell cycle arrest                                              |
| 0      | 6        | 15    | regulation of developmental process                            |
| 0.001  | 3        | 10    | response to endogenous stimulus                                |
| 0.001  | 0        | 4     | regulation of caspase activity                                 |
| 0.001  | 0        | 4     | regulation of peptidase activity                               |
| 0.001  | 0        | 4     | regulation of endopeptidase activity                           |
| 0.001  | 8        | 18    | positive regulation of biological process                      |
| 0.001  | 7        | 17    | positive regulation of cellular process                        |
| 0.001  | 2        | 8     | regulation of cell cycle                                       |
| 0.001  | 0        | 2     | positive regulation of neuron apoptosis                        |
| 0.002  | 3        | 10    | regulation of cell proliferation                               |
| 0.002  | 5        | 13    | cell cycle                                                     |
| 0.003  | 1        | 4     | positive regulation of hydrolase activity                      |
| 0.003  | 5        | 13    | cell proliferation                                             |
| 0.003  | 1        | 4     | apoptotic program                                              |
| 0.004  | 0        | 3     | DNA damage response, signal transduction                       |
| 0.005  | 12       | 22    | cell differentiation                                           |
| 0.005  | 12       | 22    | cellular developmental process                                 |
| 0.006  | 7        | 15    | response to stress                                             |
| 0.006  | 0        | 2     | cellular response to extracellular stimulus                    |
| 0.006  | 0        | 3     | regulation of cyclin-dependent protein kinase activity         |
| 0.006  | 2        | 6     | negative regulation of cell proliferation                      |
| 0.006  | 1        | 4     | response to radiation                                          |
| 0.007  | 0        | 2     | DNA damage response, signal transduction by p53 class mediator |
| 0.007  | 0        | 1     | nucleic acid-protein covalent cross-linking                    |
| 0.007  | 0        | 1     | RNA-protein covalent cross-linking                             |
| 0.007  | 0        | 1     | positive regulation of non-apoptotic programmed cell death     |
| 0.007  | 0        | 1     | constitutive protein ectodomain proteolysis                    |
| 0.007  | 0        | 1     | regulation of helicase activity                                |
| 0.007  | 0        | 1     | negative regulation of helicase activity                       |
