# Supplementary material
Source: PubMed Central journal article supplement (PMC3901581)

Figure S1

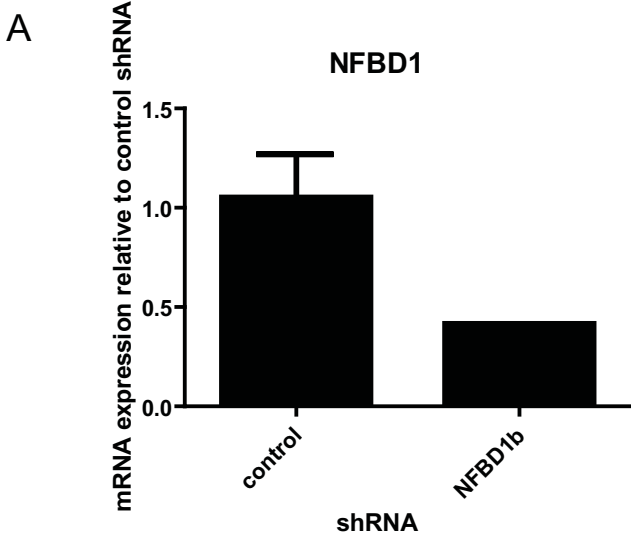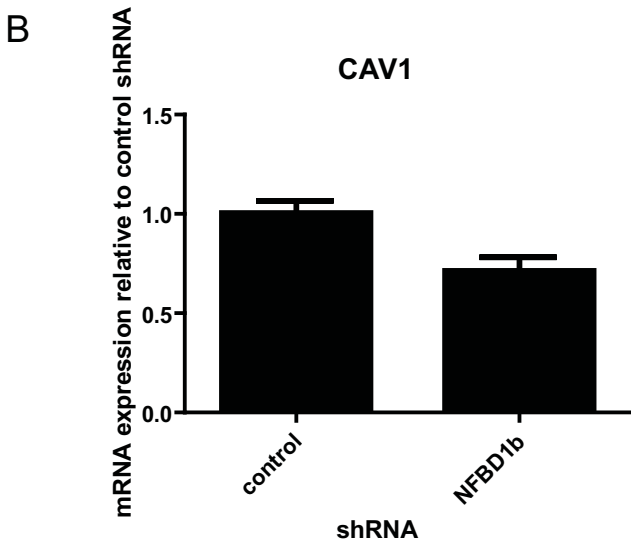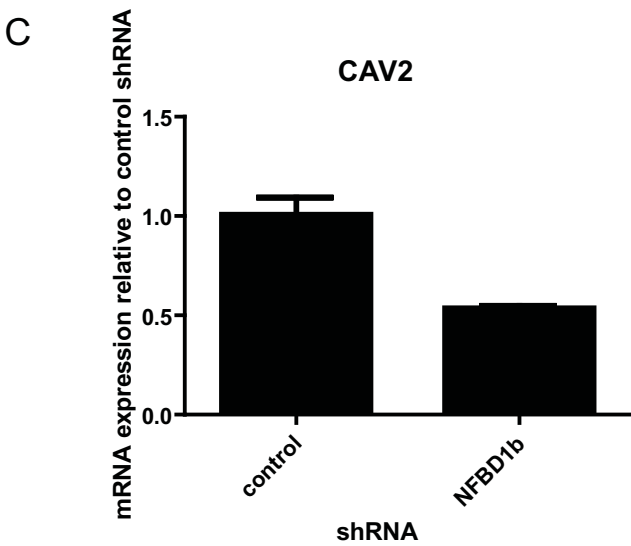

Supplement: NIHMS545938-supplement-Suppl_1.pdf [file NIHMS545938-supplement-Suppl_1.pdf]
